# Supplementary material for: A large-area luminescent downshifting layer containing an Eu3+ complex for crystalline silicon solar cells
Source: Royal Society of Chemistry journal article supplement (doi:10.1039/c9dt04858h), 2020-01-01
Supplement: c9dt04858h1.pdf [file c9dt04858h1.pdf]

## Supporting Information

# Large-area Luminescent Downshifting Layer containing Eu<sup>3+</sup> Complex for Crystalline Silicon Solar Cells

*Daqing Yang\**, *Haiduo Liang*, *Yujie Liu*, *Man Hou*, *Lipeng Kan*, *Yijia Yang*, *Zijian Zang*

Key Laboratory of Medicinal Chemistry and Molecular Diagnosis of the Ministry of Education, Key Laboratory of Analytical Science and Technology of Hebei Province, College of Chemistry and Environmental Science, Hebei University

No. 180 Wusi East Road, Baoding 071002, Hebei (China)

E-mail: yangdaqing@hbu.edu.cn

## **Table of Contents**

1. UV-vis absorption spectra of  $\text{Eu}(\text{tta})_3 \cdot 2\text{H}_2\text{O}$ , pybox and  $\text{Eu}(\text{tta})_3\text{pybox}$
2. Partial  $^1\text{H}$  NMR spectra of A) tta; B)  $\text{Eu}(\text{tta})_3\text{pybox}$  and C) pybox in  $\text{CDCl}_3$  at 25 °C.
3. The decay curves of  $\text{Eu}(\text{tta})_3 \cdot 2\text{H}_2\text{O}$  and  $\text{Eu}(\text{tta})_3\text{pybox}$
4. UV-Vis transmittance spectra of thin film containing  $\text{Eu}(\text{tta})_3\text{pybox}$
5. SEM images of the  $\text{Eu}(\text{tta})_3\text{pybox}$ -containing thin film

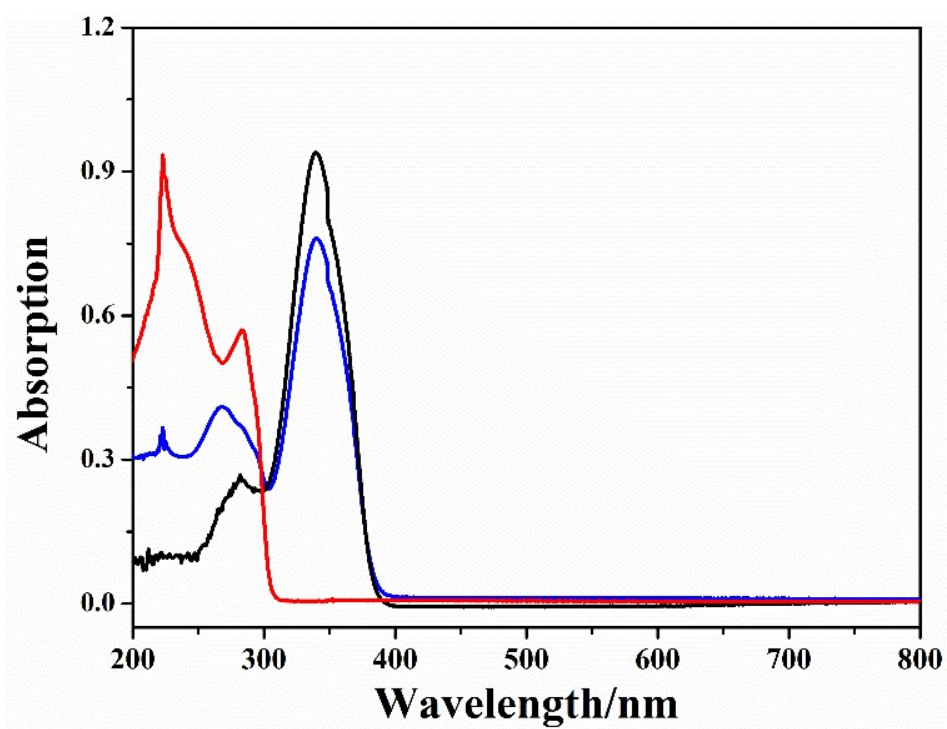

**Figure S1.** UV-vis absorption spectra of Eu(tta)<sub>3</sub>·2H<sub>2</sub>O (black); ligand pybox (red) and Eu(tta)<sub>3</sub>pybox (blue).

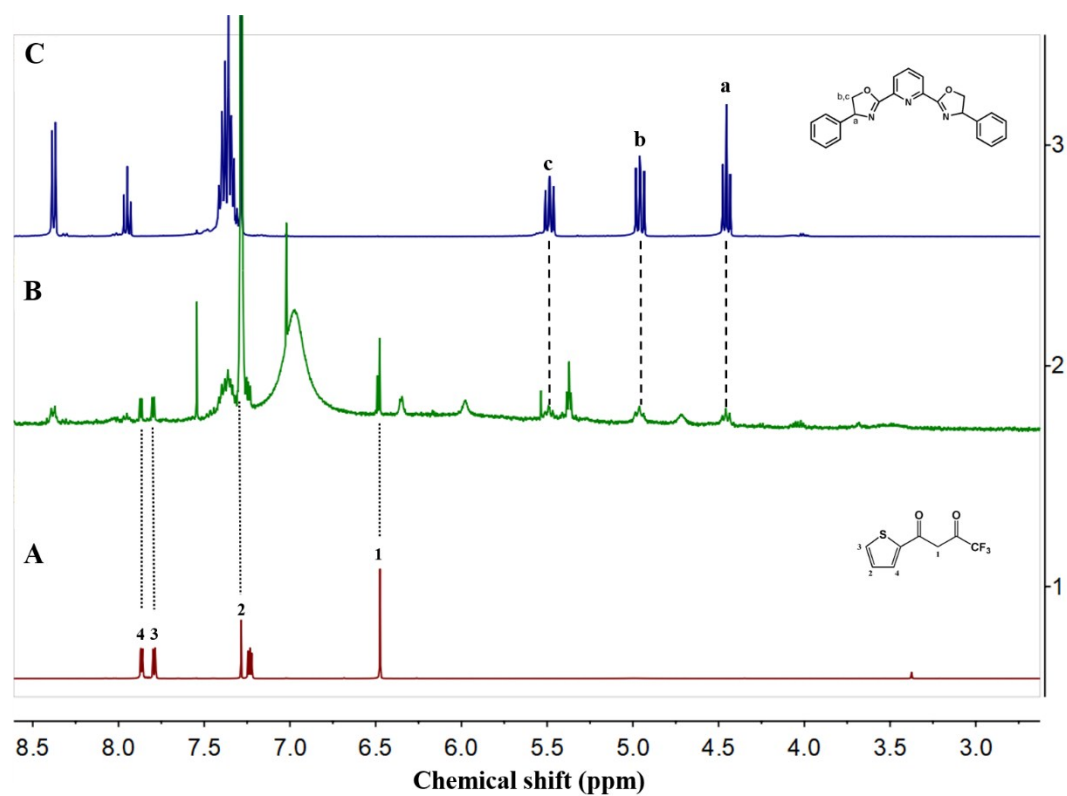

**Figure S2.** Partial <sup>1</sup>H NMR spectra of A) tta; B) Eu(tta)<sub>3</sub>pybox and C) pybox in CDCl<sub>3</sub> at 25 °C.

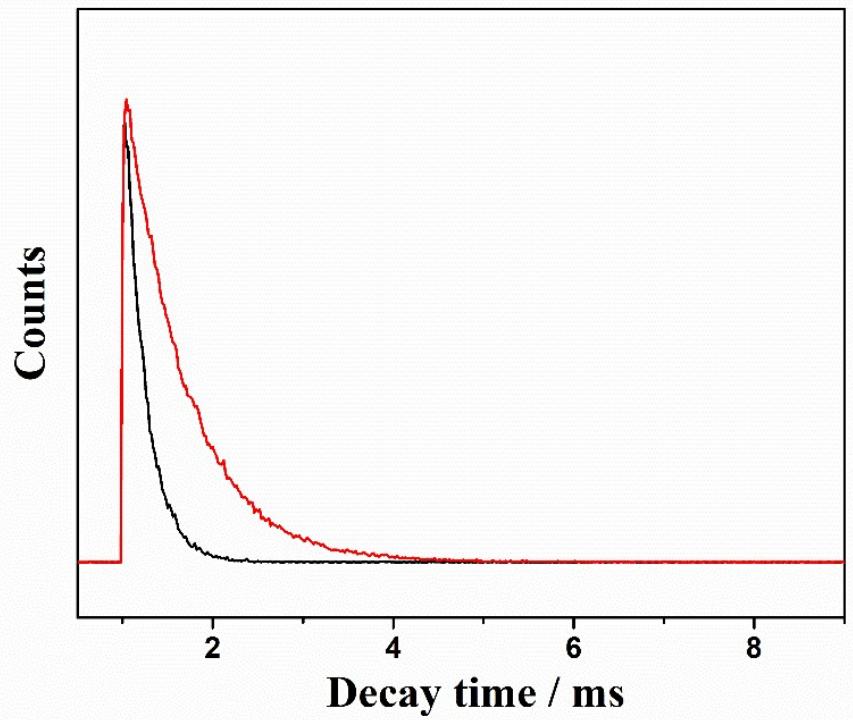

**Figure S3.** The decay curves of Eu(tta)<sub>3</sub>·2H<sub>2</sub>O (black) and Eu(tta)<sub>3</sub>pybox (red).

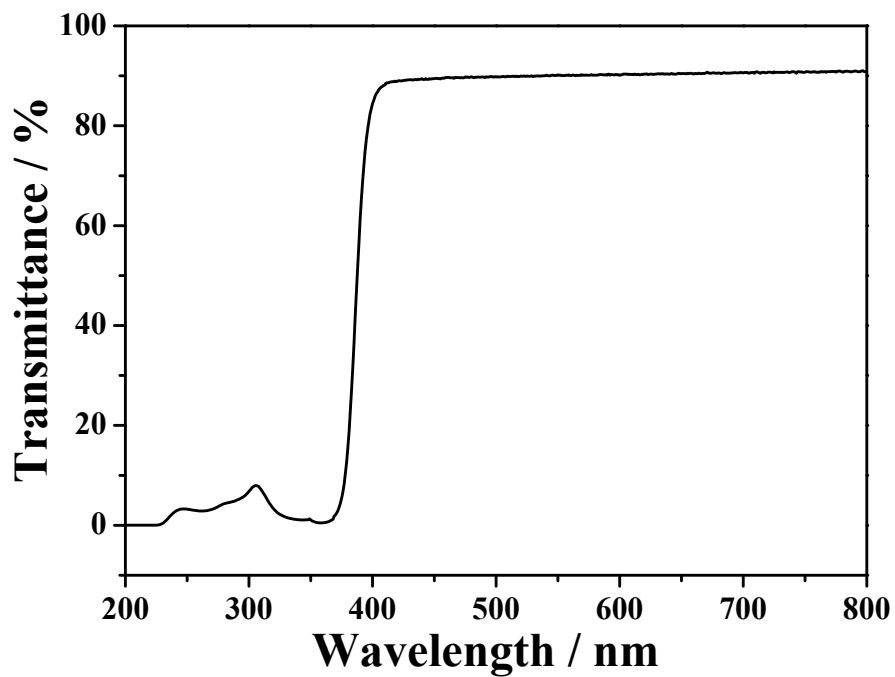

**Figure S4.** Ultraviolet-visible (UV-Vis) transmittance spectra of thin film containing Eu(tta)<sub>3</sub>pybox.

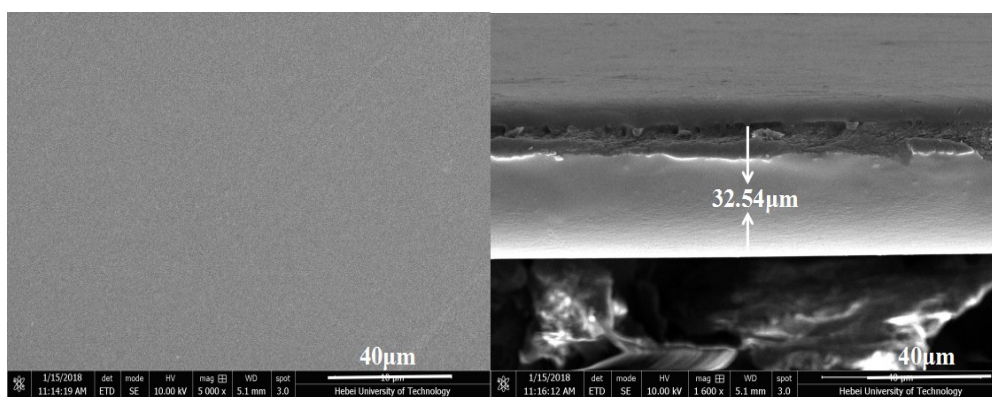

**Figure S5.** SEM images of the  $\text{Eu}(\text{tta})_3\text{pybox}$ -containing thin film (up: surface; bottom: cross section).
